# Supplementary material for: Polymorphism of felodipine co-crystals with 4,4′-bipyridine
Source: Royal Society of Chemistry journal article supplement (doi:10.1039/c4ce00756e), 2014-01-01
Supplement: c4ce00756e1.pdf [file c4ce00756e1.pdf]

# **Polymorphism of felodipine co-crystals with 4,4'- bipyridine**

Artem O. Surov, Katarzyna A. Solanko, Andrew D. Bond,  
Annette Bauer-Brandl and German L. Perlovich

## **Supporting Information**

## S1. Hirshfeld surface analysis

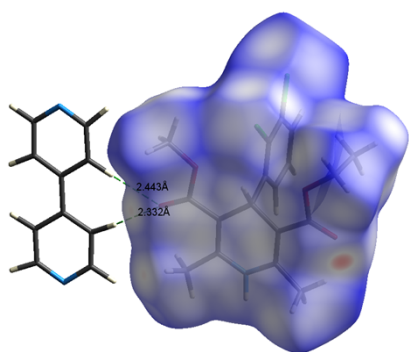

[FeI+BP] (1:1) form I

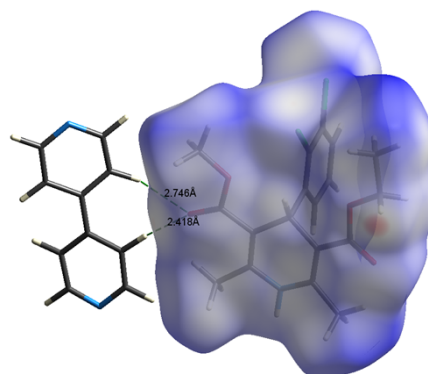

[FeI+BP] (1:1) form II

**Fig. S1.** Illustrations of the O...H contacts in the co-crystals.

## S2. Experimental PXRD patterns

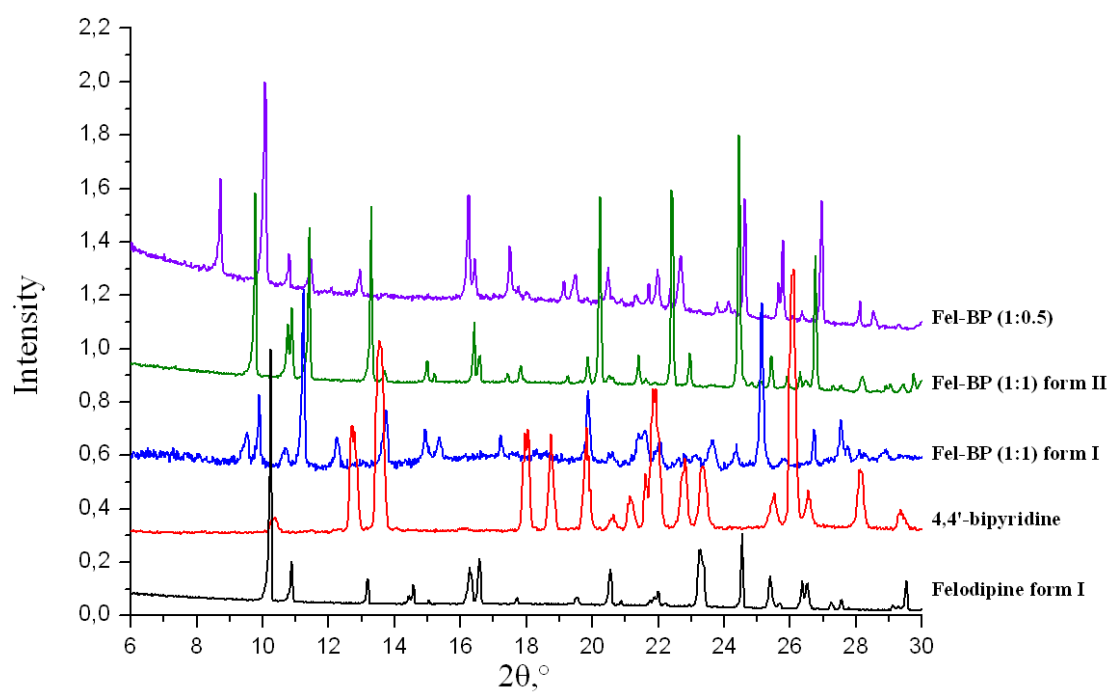

**Fig. S2.** Measured PXRD patterns of felodipine, 4,4'-bipyridine and the felodipine co-crystals

### S3. Single-crystal X-ray diffraction data

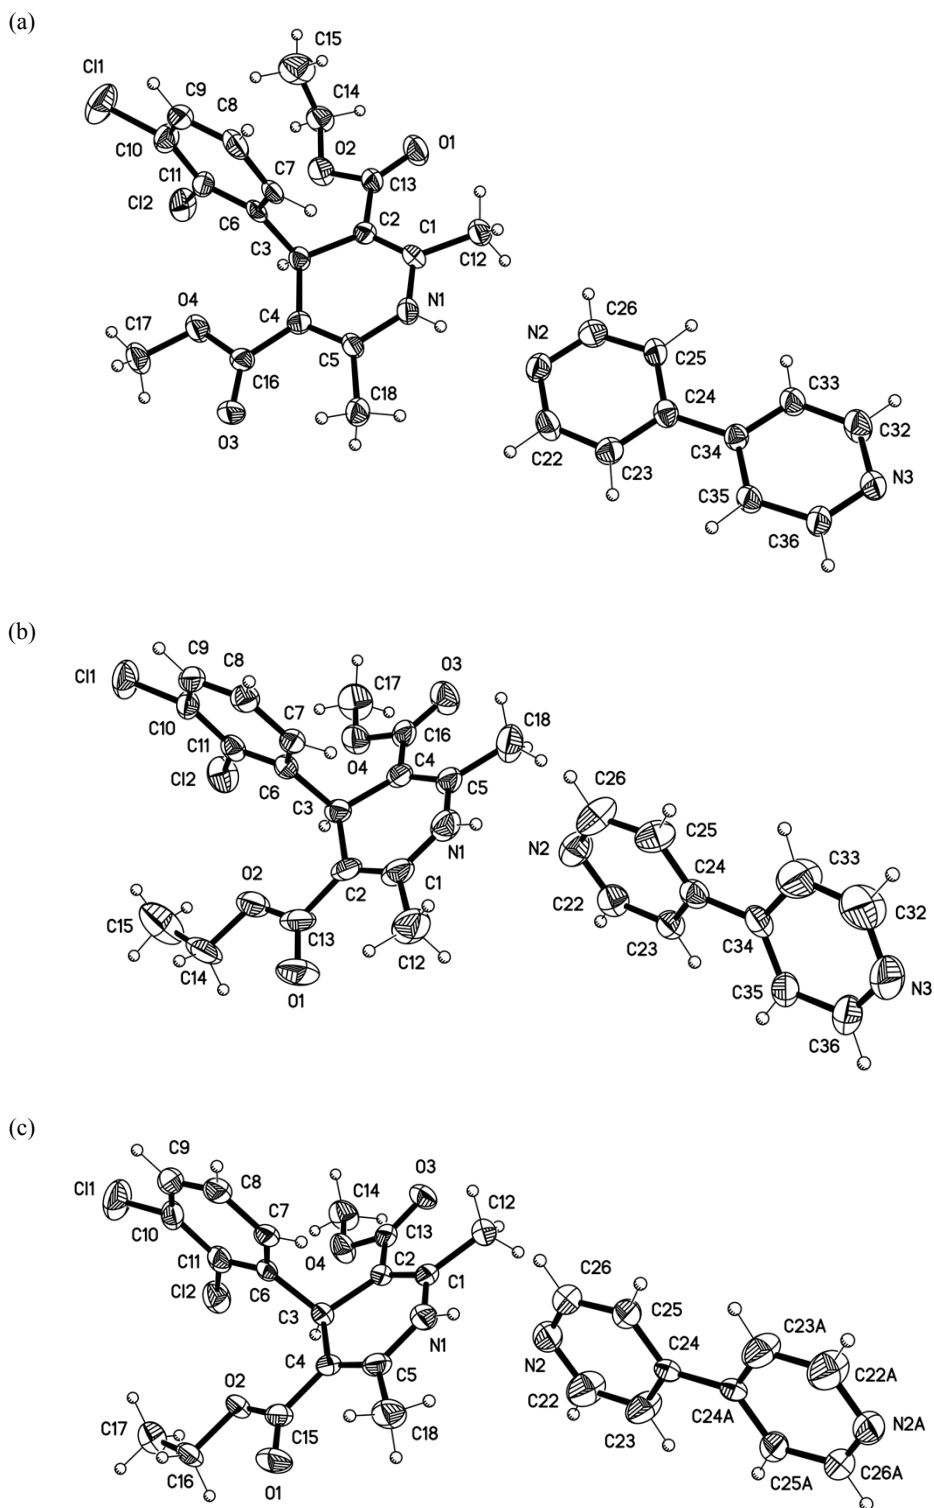

**Fig. S3.** Molecular units with atomic numbering in (a) [Fe+BP] (1:1) form I; (b) [Fe+BP] (1:1) form II; (c) [Fe+BP] (2:1). Displacement ellipsoids are shown at 50% probability.

**Table S1.** The retrieved CSD set of 4,4'-bipyridine cocrystals\*

|    |        |    |          |    |        |     |        |     |          |
|----|--------|----|----------|----|--------|-----|--------|-----|----------|
| 1  | AMIDEF | 31 | HUPPAJ   | 61 | NUCJEB | 91  | SOVDIQ | 121 | XOLHUC   |
| 2  | AMIDIJ | 32 | HUPPEN   | 62 | OFOKEA | 92  | SOVFIS | 122 | XOLHUC01 |
| 3  | BEQWAV | 33 | IDUBUF   | 63 | OFOKIE | 93  | SOVFOY | 123 | XOLHUC02 |
| 4  | BIHZAU | 34 | IFABUN   | 64 | OFOKOK | 94  | SOVHEQ | 124 | XOTYUB   |
| 5  | BOQDOA | 35 | IFUQAC   | 65 | OGEPOG | 95  | SUXVOW | 125 | XOZJAY   |
| 6  | COBLAG | 36 | IKUJIH   | 66 | OJENIA | 96  | TEKKID | 126 | XUNGIW   |
| 7  | COZXUL | 37 | IKUJON   | 67 | PANKAR | 97  | TEKKOJ | 127 | XUNGUI   |
| 8  | DAQZIF | 38 | IKUJUT   | 68 | PEGDAH | 98  | TIJKOM | 128 | XUNHAP   |
| 9  | DATQEV | 39 | JAWVAF   | 69 | POVJAL | 99  | TUQBIR | 129 | YAKVAI   |
| 10 | DEBJAW | 40 | JAWVIN   | 70 | PUFFUS | 100 | UCEXIJ | 130 | YUCQUJ   |
| 11 | DEZHIA | 41 | JAZBAO   | 71 | PUHFAA | 101 | UDUZEY | 131 | ZINZUR   |
| 12 | DIWGOG | 42 | JEHXAW   | 72 | PUJHUY | 102 | UDUZIC | 121 | XOLHUC   |
| 13 | DOKGEQ | 43 | KASYEJ   | 73 | PULWUO | 103 | UDUZOI | 122 | XOLHUC01 |
| 14 | DOYJUX | 44 | KIHYAC   | 74 | QAMRUS | 104 | UHELLO | 123 | XOLHUC02 |
| 15 | EGUXAG | 45 | KIHZOR   | 75 | QANRUS | 105 | UHOSIU | 124 | XOTYUB   |
| 16 | EJEVUK | 46 | LAPLIY   | 76 | QETMOS | 106 | UJORAM | 125 | XOZJAY   |
| 17 | FAWXUX | 47 | LAPLOE   | 77 | QIHBAK | 107 | UJOREQ | 126 | XUNGIW   |
| 18 | FIDKOT | 48 | LEDJIO   | 78 | QIHBEO | 108 | VEFWAF | 127 | XUNGUI   |
| 19 | FIHYEA | 49 | LIDVAW   | 79 | QIHBIS | 109 | VEXQOE | 128 | XUNHAP   |
| 20 | FIJCIK | 50 | LIPWUC   | 80 | QIJCUH | 110 | VEXQUK | 129 | YAKVAI   |
| 21 | FOWSAM | 51 | LOMHUR   | 81 | QOQDIJ | 111 | VEXWUQ | 130 | YUCQUJ   |
| 22 | FUHRAC | 52 | LUJCOJ   | 82 | RADDOQ | 112 | VUJTAW | 131 | ZINZUR   |
| 23 | GAWJEU | 53 | MAQYAF   | 83 | RADFOS | 113 | VUXRAI |     |          |
| 24 | GEHROB | 54 | MIYKOU   | 84 | RAPHAR | 114 | WEJHID |     |          |
| 25 | GIPQAX | 55 | MIYKOU01 | 85 | RAPXAI | 115 | WEXWEC |     |          |
| 26 | GIPQEB | 56 | MOXRUN   | 86 | RASBOD | 116 | WOVYEL |     |          |
| 27 | GIYHUS | 57 | MUFNIK   | 87 | RIRGUV | 117 | XAPWIU |     |          |
| 28 | GODTUO | 58 | MUFNIK01 | 88 | SIMHAY | 118 | XAPWUG |     |          |
| 29 | HONVAI | 59 | MUPQAP   | 89 | SITDIJ | 119 | XAQQUC |     |          |
| 30 | HOXHAE | 60 | MURFEK   | 90 | SOVBOU | 120 | XEZDIQ |     |          |

\* CSD Version 5.34 (2013 Release with Nov 2012 update). Search constraints: 3-D coordinates determined, two-component, only organics.

**Table S2.** The weight, g (mg), solution concentrations,  $m$  (mol kg<sup>-1</sup>), and solution enthalpies,  $\Delta H_{sol}^0$  (kJ·mol<sup>-1</sup>), of felodipine cocrystals in methanol at 298 K.

| Fel-BP (1:1) form I               |                   |                        | Fel-BP (1:1) form II              |                   |                        | Fel-BP (1:0.5)                    |                   |                        |
|-----------------------------------|-------------------|------------------------|-----------------------------------|-------------------|------------------------|-----------------------------------|-------------------|------------------------|
| g                                 | $m \cdot 10^{-3}$ | $\Delta H_{sol}^{298}$ | g                                 | $m \cdot 10^{-3}$ | $\Delta H_{sol}^{298}$ | g                                 | $m \cdot 10^{-3}$ | $\Delta H_{sol}^{298}$ |
| 20.49                             | 0.81              | 43.2                   | 12.59                             | 0.49              | 41.2                   | 9.41                              | 0.42              | 36.6                   |
| 15.13                             | 0.59              | 43.4                   | 14.95                             | 0.60              | 41.6                   | 10.09                             | 0.46              | 35.4                   |
| 12.28                             | 0.47              | 44.0                   | 12.84                             | 0.49              | 41.2                   | 10.97                             | 0.47              | 35.9                   |
| 11.32                             | 0.43              | 44.6                   | 12.83                             | 0.48              | 42.1                   | 10.83                             | 0.47              | 36.0                   |
| $\Delta H_{sol}^0 = 43.8 \pm 0.3$ |                   |                        | $\Delta H_{sol}^0 = 41.5 \pm 0.2$ |                   |                        | $\Delta H_{sol}^0 = 36.0 \pm 0.2$ |                   |                        |

**Table S3.** The weight, g (mg), solution concentrations,  $m$  (mol kg<sup>-1</sup>), and solution enthalpies,  $\Delta H_{sol}^0$  (kJ·mol<sup>-1</sup>), of felodipine form I in 4,4'-bipyridine methanol solution and 4,4'-bipyridine in felodipine methanol solution at 298 K.

| Felodipine form I in 1.38 <i>m</i> 4,4'-bipyridine methanol solution |                   |                        | 4,4'-bipyridine in 1.37 <i>m</i> felodipine methanol solution |                   |                        |
|----------------------------------------------------------------------|-------------------|------------------------|---------------------------------------------------------------|-------------------|------------------------|
| g                                                                    | $m \cdot 10^{-3}$ | $\Delta H_{sol}^{298}$ | g                                                             | $m \cdot 10^{-3}$ | $\Delta H_{sol}^{298}$ |
| 25.23                                                                | 1.38              | 21.2                   | 10.05                                                         | 1.35              | 17.2                   |
| 25.52                                                                | 1.29              | 21.1                   | 11.47                                                         | 1.42              | 17.6                   |
| 24.88                                                                | 1.37              | 21.1                   | 10.54                                                         | 1.41              | 17.6                   |
| 25.09                                                                | 1.38              | 21.6                   | 11.11                                                         | 1.51              | 17.1                   |
| $\Delta H_{sol}^0 = 21.3 \pm 0.1$                                    |                   |                        | $\Delta H_{sol}^0 = 17.4 \pm 0.1$                             |                   |                        |
| Felodipine form I in 0.79 <i>m</i> 4,4'-bipyridine methanol solution |                   |                        | 4,4'-bipyridine in 2.71 <i>m</i> felodipine methanol solution |                   |                        |
| g                                                                    | $m \cdot 10^{-3}$ | $\Delta H_{sol}^{298}$ | g                                                             | $m \cdot 10^{-3}$ | $\Delta H_{sol}^{298}$ |
| 28.93                                                                | 1.54              | 20.3                   | 10.08                                                         | 1.36              | 21.6                   |
| 28.84                                                                | 1.49              | 21.7                   | 10.04                                                         | 1.36              | 21.4                   |
| 29.48                                                                | 1.59              | 21.5                   | 10.44                                                         | 1.38              | 21.8                   |
| 28.78                                                                | 1.57              | 21.5                   | 10.53                                                         | 1.36              | 21.6                   |
| $\Delta H_{sol}^0 = 21.3 \pm 0.3$                                    |                   |                        | $\Delta H_{sol}^0 = 21.6 \pm 0.1$                             |                   |                        |
